# Supplementary material for: Comparative biodegradation analysis of three compostable polyesters by a marine microbial community
Source: PubMed Central journal article supplement (PMC10734441; doi:10.1128/aem.01060-23), 2023-11-28
Supplement: aem.01060-23-s0001.pdf [file aem.01060-23-s0001.pdf]

Comparative biodegradation analysis of three  
compostable polyesters by a marine microbial community

Supplementary information, includes: Supplementary figures 1-10,  
Supplementary tables 1-3

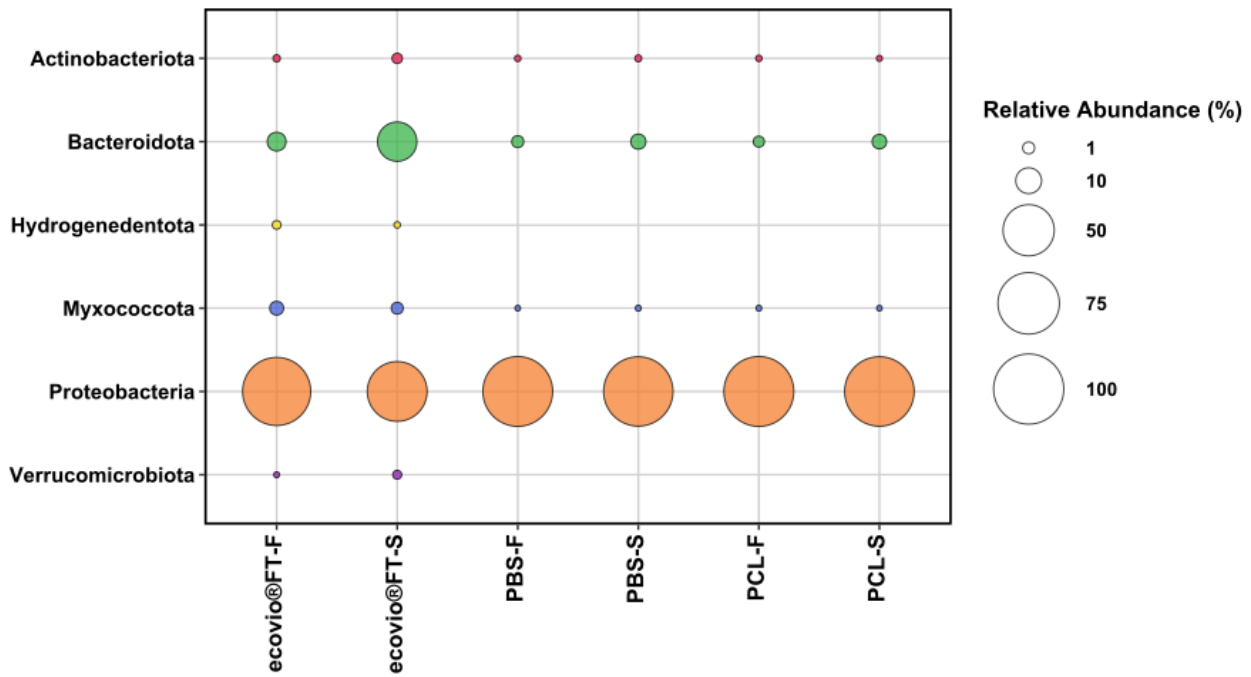

Figure S1: Taxonomic distribution of the microbial community at phylum level. The size of the bubbles represents percent abundance.

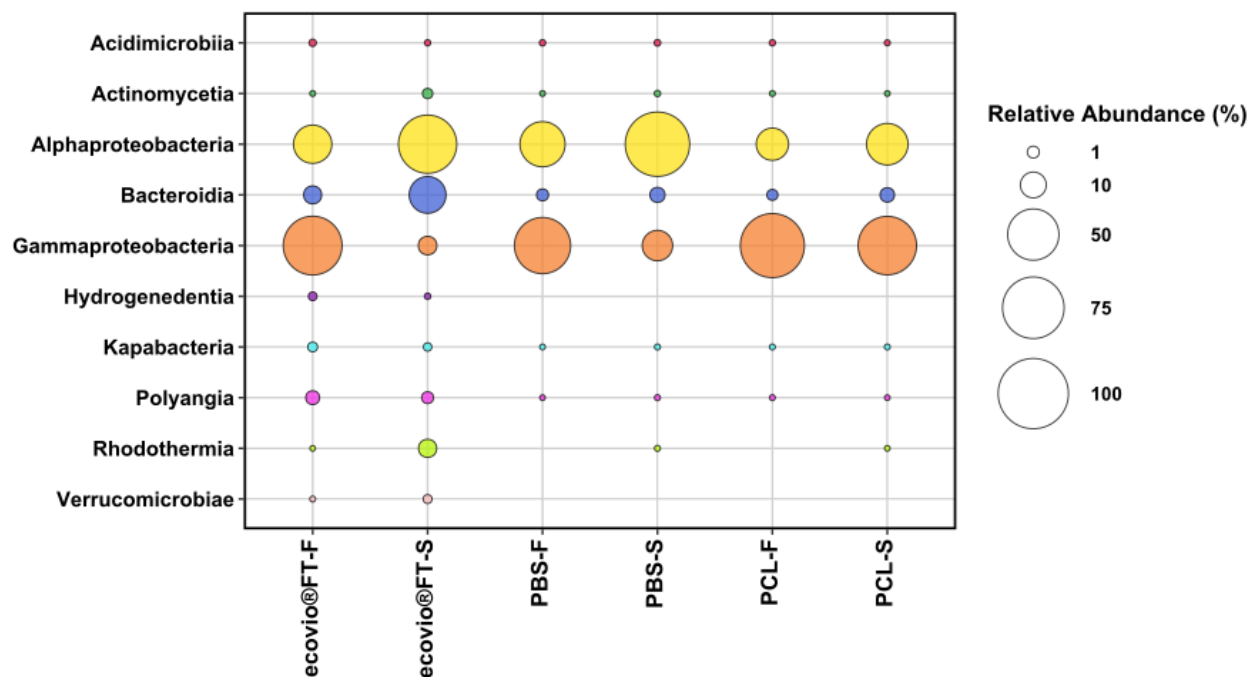

Figure S2: Taxonomic distribution of the microbial community at class level. The size of the bubbles represents percent abundance.

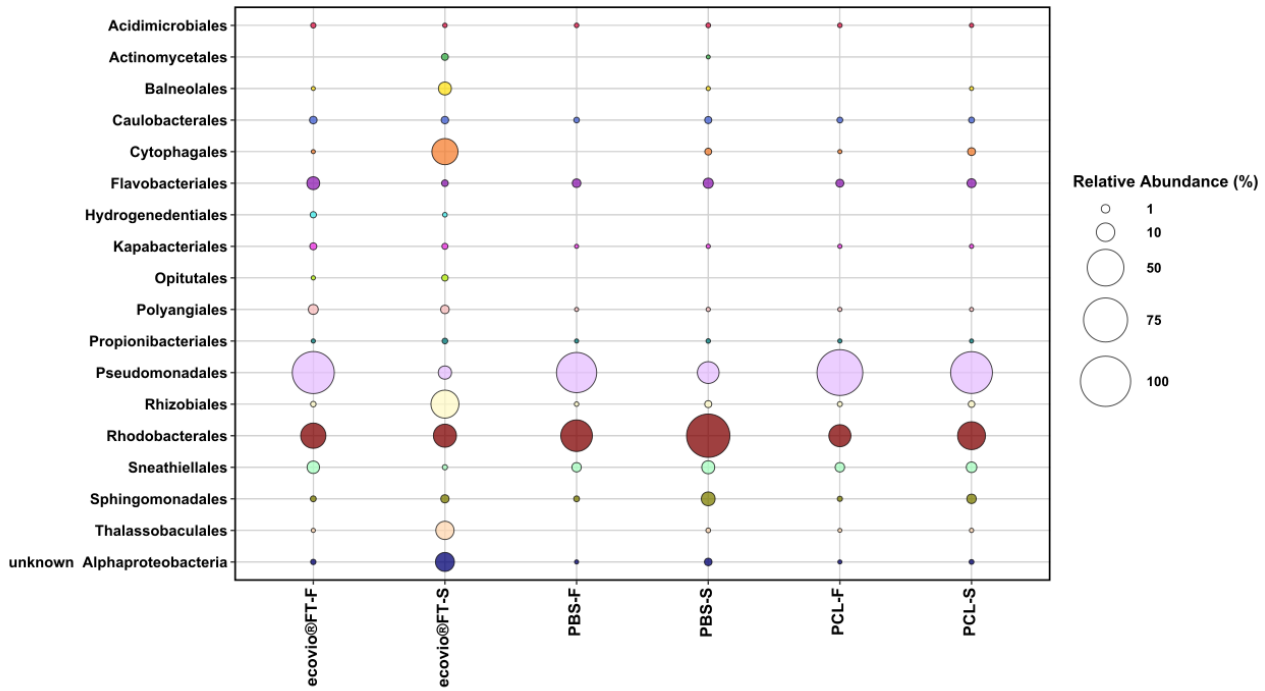

Figure S3: Taxonomic distribution of the microbial community at order level. The size of the bubbles represents percent abundance.

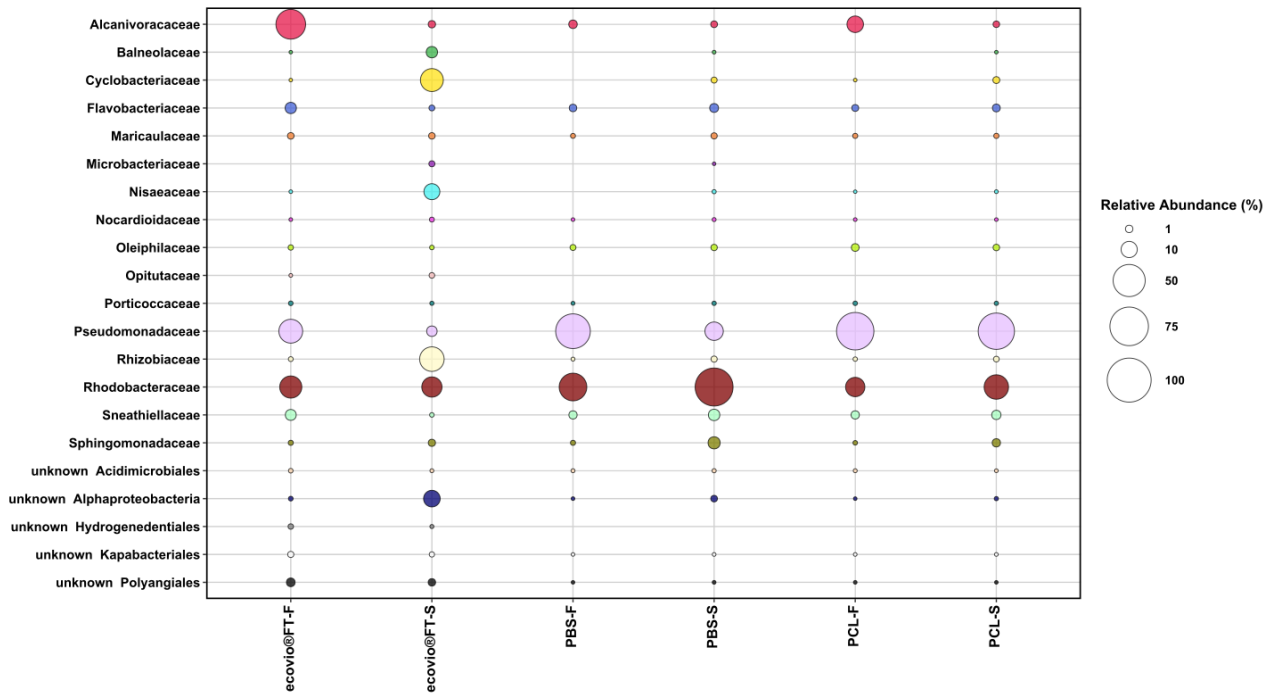

Figure S4: Taxonomic distribution of the microbial community at family level. The size of the bubbles represents percent abundance.

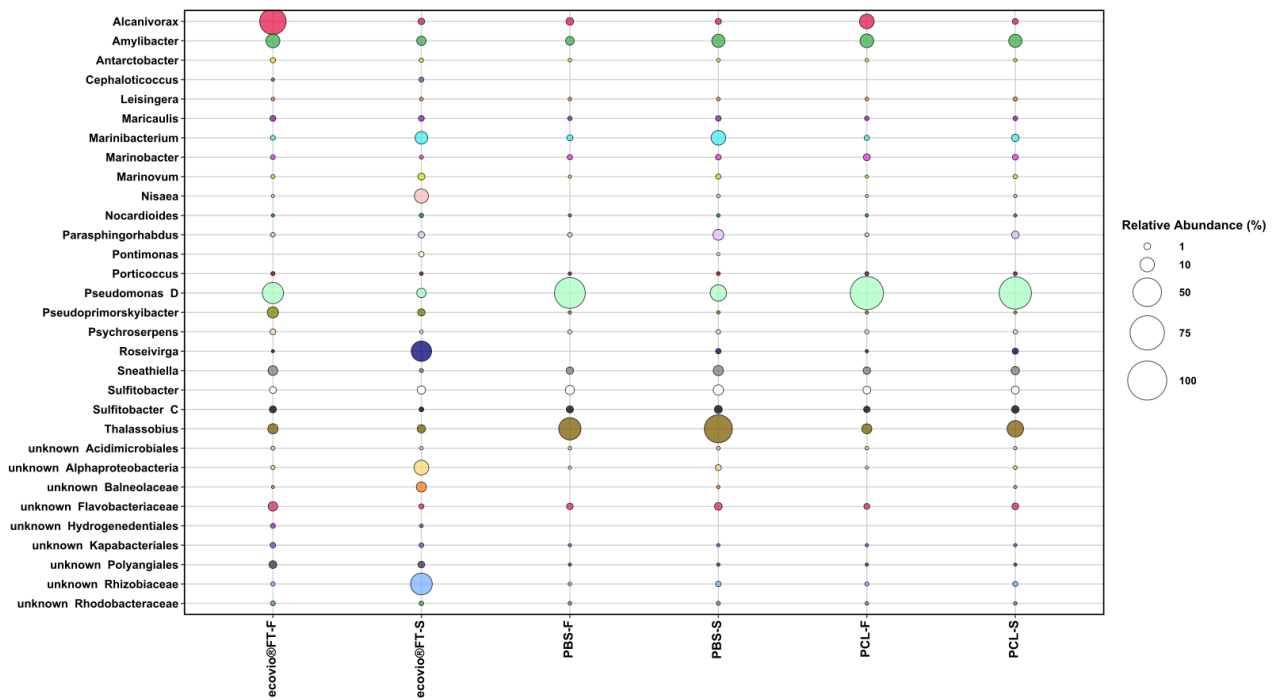

Figure S5: Taxonomic distribution of the microbial community at genus level. The size of the bubbles represents percent abundance.

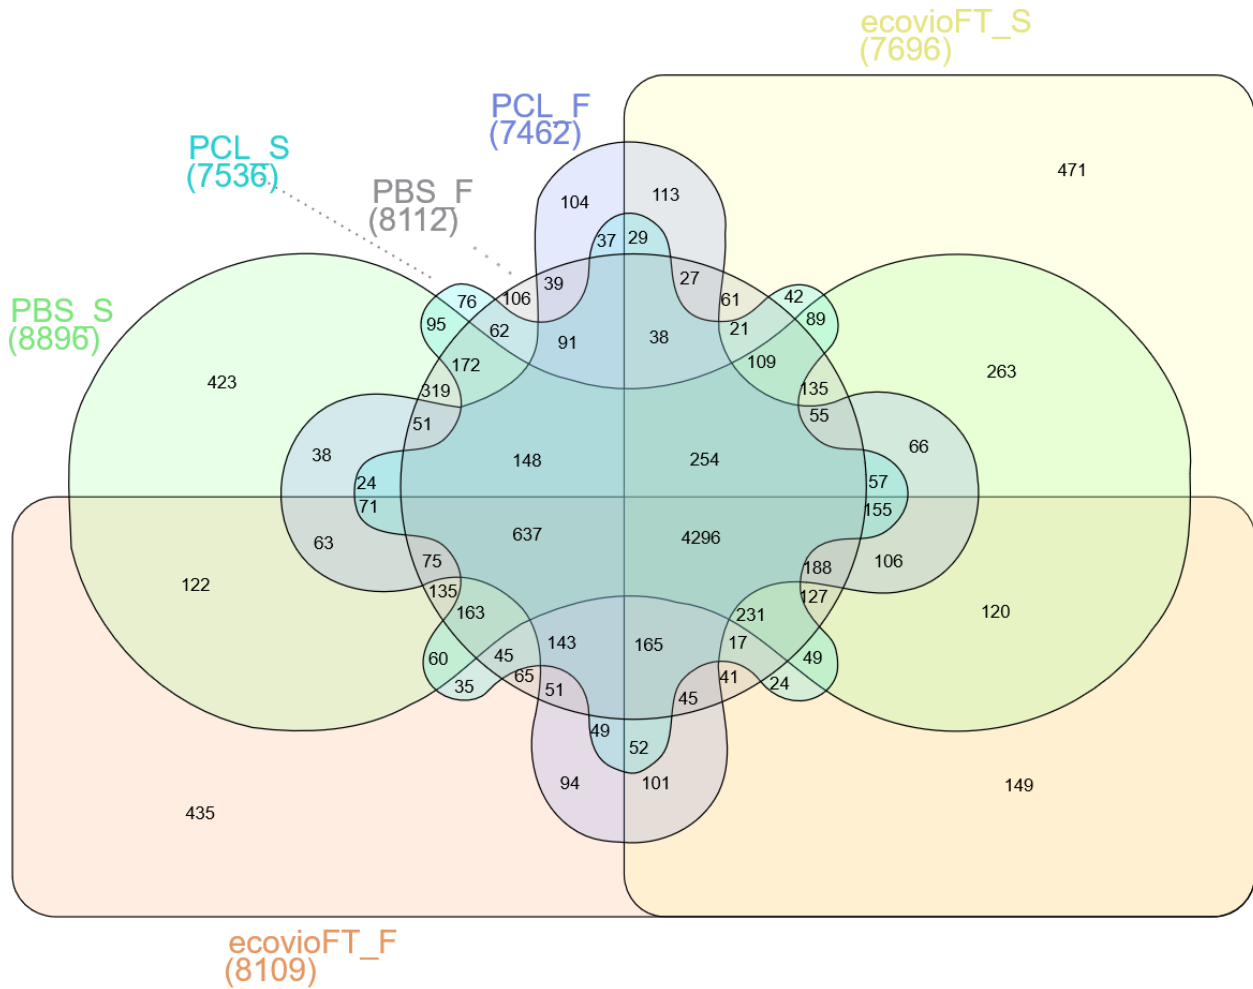

Figure S6: Venn Diagram of proteins formed under different experimental conditions.

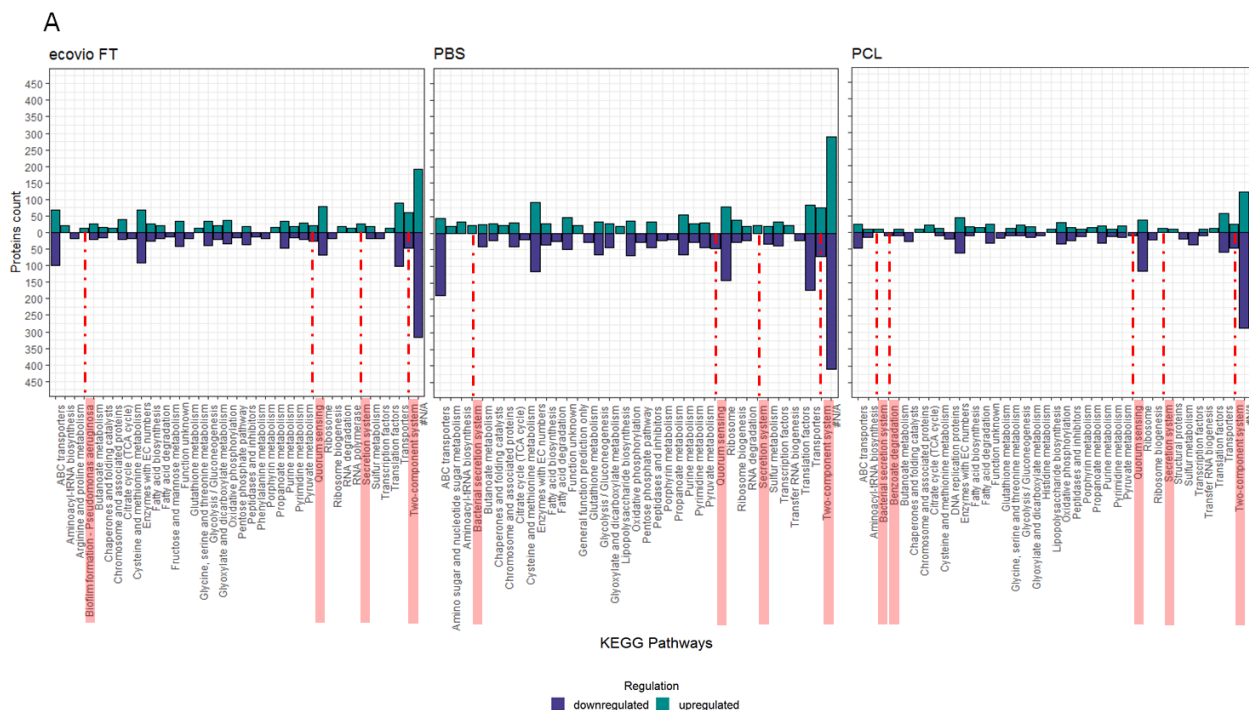

**B**

| PATHWAY                                     | UPREGULATED            |     |     | DOWNREGULATED          |     |     |
|---------------------------------------------|------------------------|-----|-----|------------------------|-----|-----|
|                                             | ecovio <sup>®</sup> FT | PBS | PCL | ecovio <sup>®</sup> FT | PBS | PCL |
| Aminobenzoate degradation                   | 3                      | 2   |     | 2                      | 5   | 2   |
| Bacterial motility proteins                 | 1                      | 2   |     |                        |     |     |
| Bacterial secretion system                  | 11                     | 23  | 10  | 6                      | 9   | 2   |
| Benzoate degradation                        | 7                      | 11  | 1   | 13                     | 14  | 11  |
| Biofilm formation - Escherichia coli        | 9                      | 14  | 2   | 3                      | 11  | 5   |
| Biofilm formation - Pseudomonas aeruginosa  | 14                     | 18  | 4   | 1                      | 6   | 1   |
| Biofilm formation - Vibrio cholerae         | 4                      | 6   | 6   | 4                      | 5   | 4   |
| Caprolactam degradation                     | 1                      |     |     |                        |     |     |
| Cell motility                               | 4                      | 2   | 1   |                        | 1   |     |
| Chloroalkane and chloroalkene degradation   |                        | 1   | 1   | 2                      | 3   | 1   |
| Flagellar assembly                          | 4                      | 13  | 7   | 2                      | 2   | 7   |
| Fluorobenzoate degradation                  | 1                      | 2   | 3   | 4                      | 2   | 3   |
| Methane metabolism                          | 7                      | 10  | 4   | 5                      | 10  | 2   |
| Naphthalene degradation                     |                        |     | 1   |                        | 1   |     |
| Nitrotoluene degradation                    |                        | 2   | 1   |                        |     | 1   |
| Polycyclic aromatic hydrocarbon degradation | 3                      | 3   | 2   | 1                      | 2   | 1   |
| Prokaryotic defense system                  | 6                      | 11  | 1   | 1                      | 2   | 4   |
| Quorum sensing                              | 20                     | 10  | 9   | 27                     | 46  | 11  |
| Secretion system                            | 25                     | 24  | 12  | 3                      | 7   | 9   |
| Starch and sucrose metabolism               | 3                      | 1   |     | 1                      | 2   | 2   |
| Steroid degradation                         | 1                      | 2   |     | 1                      |     |     |
| Two-component system                        | 60                     | 77  | 25  | 46                     | 71  | 48  |

**Figure S7: Regulation of selected pathways under different experimental conditions.** A) Regulation of metabolic pathways based on absolute numbers of up-and-downregulated proteins. B) Zoomed-in view of the regulation of selected pathways potentially related to biofilm formation and biodegradation.



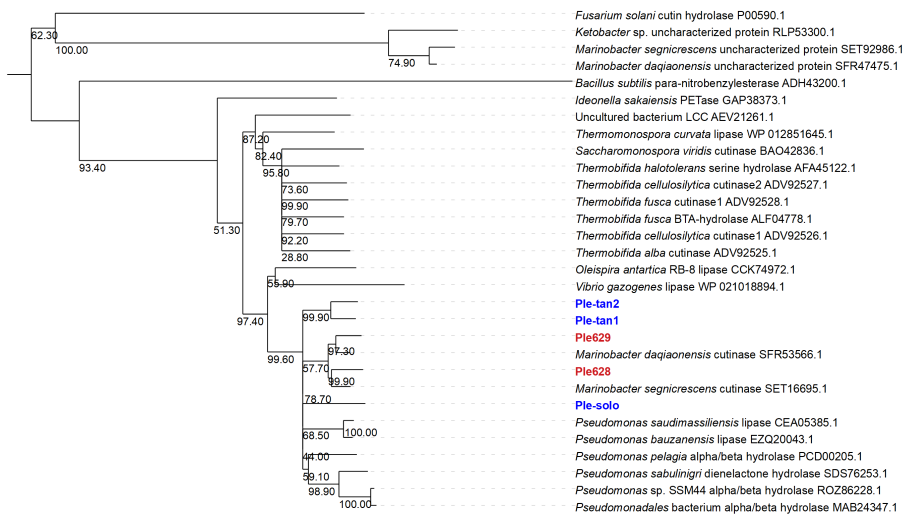

**Figure S8: Phylogeny of the Ples identified in this study and their relatives.** The numbers on the branches represent the bootstrap values. The Neighbor-joining tree was calculated by with Geneious<sup>®</sup> with 1,000 bootstrap replicates. The protein alignment was made with Clustal Omega.

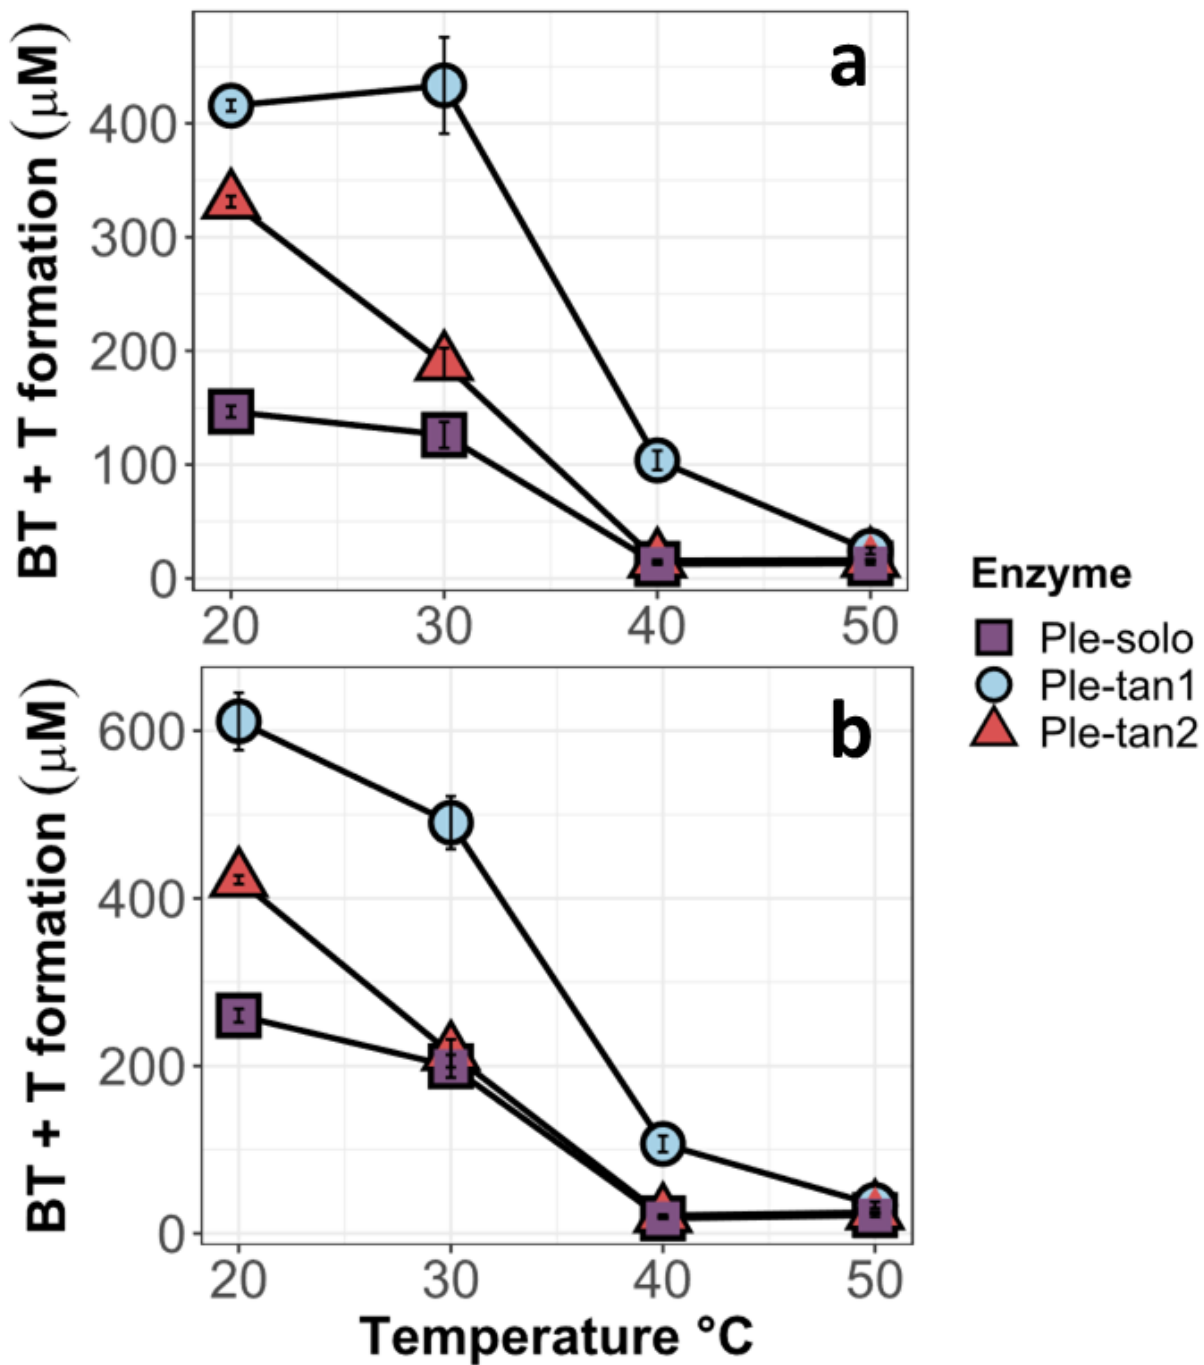

**Figure S9: Temperature optima of Ple-tan1, Ple-tan2, and Ple-solo.** Temperature optima of Ple-tan1, Ple-tan2, and Ple-solo. The formation of BT and T (in  $\mu\text{M}$ ) was quantified after degradation of ecovio<sup>®</sup> FT at different temperatures by Ple-tan1 (blue circle), Pletan2 (red triangle) and Ple-solo (purple square). Two time points were taken, after 24 (a) and 48 h (b).

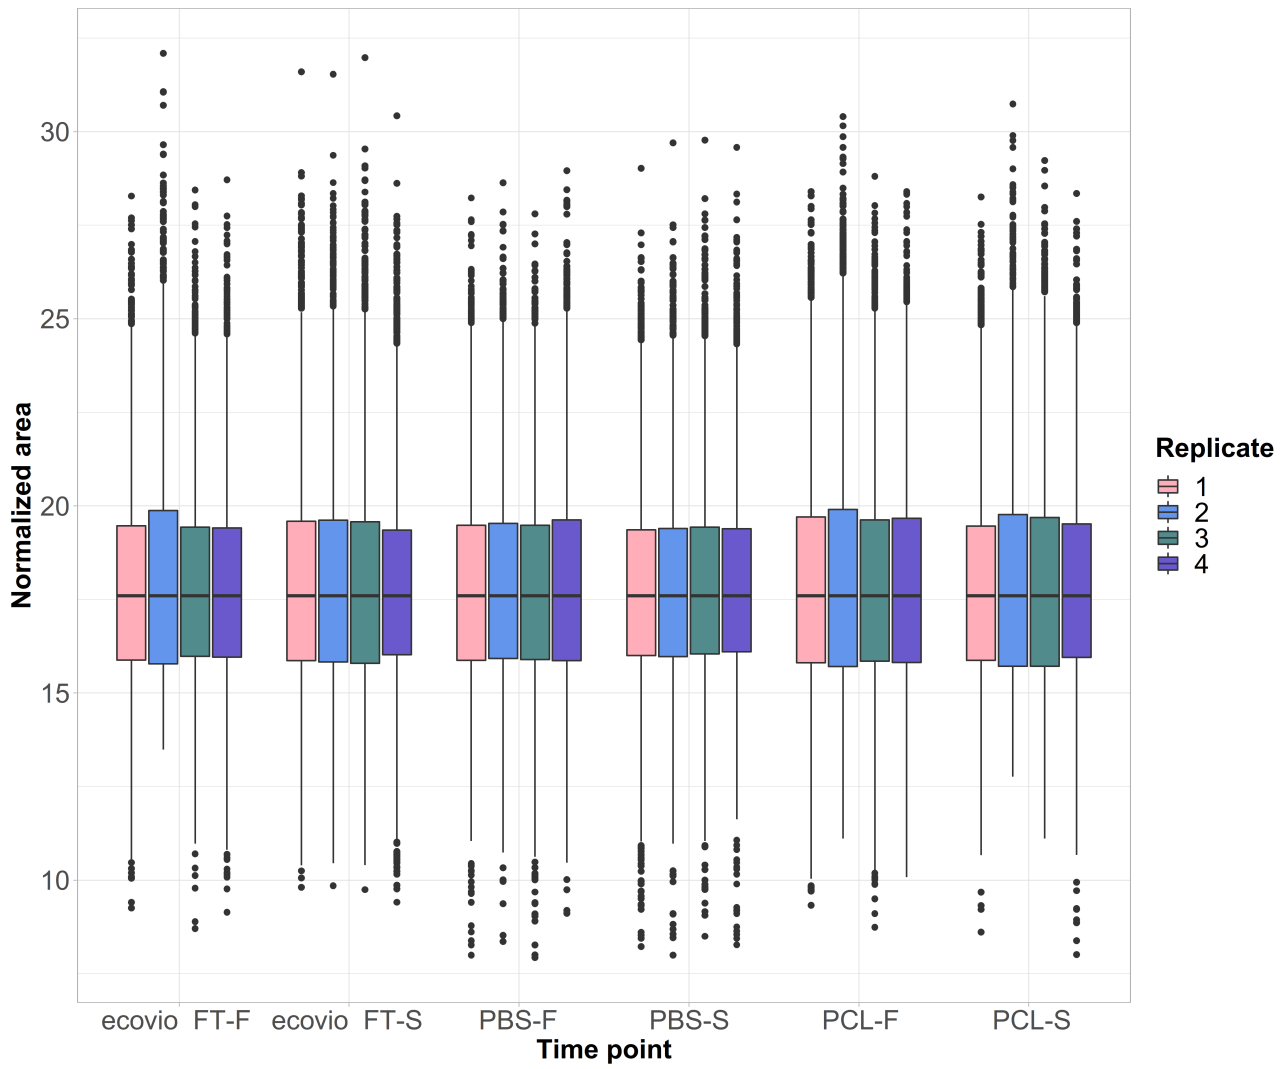

**Figure S10: Comparison of the biological replicates for the metaproteome.** Box plots show the  $1.5 \times$  interquartile range, the maximum and minimum data point within the range of samples represented by whiskers, the median value of the samples represented by the center line and the outliers of the different data sets ( $n = 4$ ).

**Table S1:** Genome stats of MAGs.

| <b>Study ID name</b>                  | <b>MAG_ID</b> | <b>Completeness</b> | <b>Contamination</b> | <b>Strain_heterogeneity</b> | <b>MAG_Ids</b> | <b>#Contigs</b> | <b>TotalLength_</b> |
|---------------------------------------|---------------|---------------------|----------------------|-----------------------------|----------------|-----------------|---------------------|
| Acidimicrobiales_bin 25               | EC_MBIn.25    | 78.48               | 3.37                 | 28.57                       | EC_MBIn.25.fa  | 1307            | 3896747             |
| <i>Pontimonas_bin 27</i>              | EC_MBIn.27    | 89.31               | 3.12                 | 100                         | EC_MBIn.27.fa  | 105             | 1450298             |
| <i>Nocardioides_bin 7</i>             | EC_MBIn.7     | 90.54               | 1.56                 | 0                           | EC_MBIn.7.fa   | 586             | 3707529             |
| <i>Roseivirga_PB_bin 40</i>           | PB_MBIn.40    | 98.9                | 0.3                  | 0                           | PB_MBIn.40.fa  | 14              | 4023689             |
| Flavobacteriaceae_bin 22              | EC_MBIn.22    | 97.21               | 0.19                 | 0                           | EC_MBIn.22.fa  | 9               | 2952099             |
| <i>Psychroserpens_bin 41</i>          | EC_MBIn.41    | 99.67               | 0.33                 | 0                           | EC_MBIn.41.fa  | 12              | 3403337             |
| Kapabacteriales_bin 42                | EC_MBIn.42    | 96.07               | 0                    | 0                           | EC_MBIn.42.fa  | 18              | 3081701             |
| Balneolaceae_bin 52                   | EC_MBIn.52    | 99.72               | 0.94                 | 0                           | EC_MBIn.52.fa  | 23              | 3759651             |
| Hydrogenedentiales_bin 53             | EC_MBIn.53    | 98.9                | 1.28                 | 0                           | EC_MBIn.53.fa  | 102             | 7443872             |
| Polyangiales_bin 16                   | EC_MBIn.16    | 95.81               | 2.87                 | 0                           | EC_MBIn.16.fa  | 105             | 7933502             |
| Maricaulis_bin 40                     | EC_MBIn.40    | 99.46               | 0                    | 0                           | EC_MBIn.40.fa  | 12              | 3146192             |
| Rhizobiaceae_bin 21                   | PC_MBIn.21    | 75.86               | 0                    | 0                           | PC_MBIn.21.fa  | 21              | 5599007             |
| Rhodobacteraceae_bin 3                | EC_MBIn.3     | 99                  | 2.15                 | 15.79                       | EC_MBIn.3.fa   | 204             | 6548356             |
| <i>Amylibacter_bin 29</i>             | PB_MBIn.29    | 100                 | 0.61                 | 0                           | PB_MBIn.29.fa  | 7               | 4448939             |
| <i>Amylibacter_bin 43</i>             | EC_MBIn.43    | 96.28               | 0.76                 | 0                           | EC_MBIn.43.fa  | 115             | 4324215             |
| <i>Antarctobacter_bin 6</i>           | EC_MBIn.6     | 99.15               | 0.27                 | 0                           | EC_MBIn.6.fa   | 18              | 4972749             |
| <i>Leisingera_bin 33</i>              | PC_MBIn.33    | 97.26               | 3.35                 | 30.43                       | PC_MBIn.33.fa  | 386             | 4727832             |
| <i>Marinibacterium_bin 35</i>         | EC_MBIn.35    | 98.08               | 0.53                 | 0                           | EC_MBIn.35.fa  | 29              | 5077940             |
| <i>Marinovum_PB_bin 42</i>            | PB_MBIn.42    | 99.19               | 1.28                 | 0                           | PB_MBIn.42.fa  | 68              | 4778466             |
| <i>Pseudoprismorskyibacter_bin 44</i> | EC_MBIn.44    | 97.94               | 0.6                  | 25                          | EC_MBIn.44.fa  | 15              | 4125293             |

| Study ID name                       | MAG_ID     | Completeness | Contamination | Strain_heterogeneity | MAG_Ids       | #Contigs | TotalLength_ |
|-------------------------------------|------------|--------------|---------------|----------------------|---------------|----------|--------------|
| <i>Sulfitobacter_bin 9</i>          | PB_MBin.9  | 99.36        | 0.48          | 0                    | PB_MBin.9.fa  | 26       | 4291996      |
| <i>Sulfitobacter_bin 38</i>         | EC_MBin.38 | 77.34        | 2.14          | 0                    | EC_MBin.38.fa | 727      | 2789054      |
| <i>Sulfitobacter_PC_bin 7</i>       | PC_MBin.7  | 98.08        | 1.12          | 75                   | PC_MBin.7.fa  | 25       | 3321653      |
| <i>Thalassobius_bin 47</i>          | EC_MBin.47 | 99.36        | 0.32          | 50                   | EC_MBin.47.fa | 16       | 3849804      |
| <i>Thalassobius_PB_bin 16</i>       | PB_MBin.16 | 97.76        | 1.18          | 0                    | PB_MBin.16.fa | 73       | 3305869      |
| <i>Sneathiella_bin 17</i>           | PC_MBin.17 | 100          | 1.3           | 33.33                | PC_MBin.17.fa | 4        | 4012830      |
| <i>Parasphingorhabdus_PB_bin 30</i> | PB_MBin.30 | 99.09        | 1.51          | 0                    | PB_MBin.30.fa | 7        | 3560352      |
| <i>Nisaea_bin 30</i>                | EC_MBin.30 | 100          | 0.43          | 0                    | EC_MBin.30.fa | 8        | 4540858      |
| <i>Alphaproteobacteria_bin 49</i>   | EC_MBin.49 | 95.7         | 0             | 0                    | EC_MBin.49.fa | 28       | 1335152      |
| <i>Alcanivorax_bin 24</i>           | EC_MBin.24 | 100          | 0.37          | 0                    | EC_MBin.24.fa | 8        | 3741446      |
| <i>Marinobacter_PB_bin 43</i>       | PB_MBin.43 | 98.15        | 0.22          | 0                    | PB_MBin.43.fa | 33       | 3413678      |
| <i>Marinobacter_bin 48</i>          | PC_MBin.48 | 97.83        | 0.37          | 33.33                | PC_MBin.48.fa | 35       | 3480127      |
| <i>Porticoccus_bin 19</i>           | PC_MBin.19 | 89.02        | 1.85          | 0                    | PC_MBin.19.fa | 292      | 2238034      |
| <i>Pseudomonas_bin 31</i>           | EC_MBin.31 | 96.12        | 0.95          | 0                    | EC_MBin.31.fa | 17       | 3949044      |
| <i>Cephalotococcus_bin 50</i>       | EC_MBin.50 | 99.32        | 0.68          | 0                    | EC_MBin.50.fa | 25       | 3912542      |

Table S2: Input data for Figure 3

| Class               | GENES          |          |       |                | PROTEINS |       |                |          |       |                |
|---------------------|----------------|----------|-------|----------------|----------|-------|----------------|----------|-------|----------------|
|                     | F              | S        | F     |                | F        | S     | F              |          |       |                |
|                     | % in ecovio FT | % in PBS | % PCL | % in ecovio FT | % in PBS | % PCL | % in ecovio FT | % in PBS | % PCL | % in ecovio FT |
| Alphaproteobacteria | 3.09           | 0.37     | 0.28  | 0.19           | 0.09     | 0.08  | 0.51           | 0.28     | 0.49  | 0.39           |
| Alphaproteobacteria | 0.38           | 3.93     | 2.23  | 0.06           | 0.05     | 0.05  | 0.90           | 0.42     | 0.79  | 0.28           |
| Actinomycetia       | 0.00           | 0.00     | 0.00  | 1.42           | 0.00     | 0.00  | 0.00           | 0.00     | 0.00  | 0.00           |
| Alphaproteobacteria | 1.11           | 7.39     | 3.01  | 5.82           | 0.87     | 0.47  | 1.28           | 1.31     | 4.44  | 8.00           |
| Alphaproteobacteria | 13.04          | 2.06     | 0.03  | 0.09           | 0.01     | 0.03  | 1.85           | 0.42     | 0.39  | 1.17           |
| Alphaproteobacteria | 0.80           | 0.16     | 0.56  | 0.12           | 0.22     | 0.10  | 0.51           | 0.28     | 0.39  | 0.61           |
| Polyangia           | 0.00           | 0.01     | 0.25  | 0.04           | 0.03     | 0.00  | 1.15           | 0.70     | 0.89  | 0.11           |
| Alphaproteobacteria | 16.38          | 0.00     | 0.00  | 0.00           | 0.01     | 0.00  | 2.75           | 0.23     | 0.99  | 0.67           |
| Gammaproteobacteria | 0.01           | 0.00     | 0.39  | 0.00           | 0.02     | 0.00  | 0.06           | 0.05     | 0.10  | 0.00           |
| Alphaproteobacteria | 0.01           | 0.02     | 0.11  | 12.24          | 17.88    | 14.42 | 0.38           | 4.06     | 6.12  | 20.62          |
| Bacteroidota        | 11.54          | 0.10     | 0.00  | 0.00           | 0.00     | 0.01  | 1.15           | 0.23     | 0.49  | 0.17           |
| Gammaproteobacteria | 14.81          | 40.79    | 68.89 | 0.00           | 0.00     | 0.00  | 22.31          | 5.60     | 23.10 | 0.56           |
| Acidomicrobiia      | 0.09           | 0.05     | 0.06  | 0.00           | 0.00     | 0.00  | 0.00           | 0.05     | 0.00  | 0.00           |
| Actinomycetia       | 0.00           | 0.00     | 0.00  | 2.92           | 0.00     | 0.00  | 0.00           | 0.05     | 0.10  | 0.06           |
| Alphaproteobacteria | 0.05           | 0.00     | 0.11  | 1.14           | 1.65     | 0.01  | 10.23          | 0.70     | 5.63  | 0.61           |
| Alphaproteobacteria | 0.00           | 0.00     | 0.00  | 7.97           | 13.71    | 15.70 | 0.13           | 0.09     | 0.30  | 0.94           |
| Alphaproteobacteria | 0.00           | 0.02     | 0.00  | 9.61           | 2.87     | 0.10  | 0.38           | 1.63     | 1.28  | 5.61           |

Table S2 continued from previous page

|                     | GENES  |        |        |        |        |        | PROTEINS |        |        |        |      |  |
|---------------------|--------|--------|--------|--------|--------|--------|----------|--------|--------|--------|------|--|
| Gammaproteobacteria | 15.60  | 43.67  | 0.00   | 0.00   | 0.00   | 0.00   | 0.00     | 32.61  | 62.72  | 25.27  | 4.61 |  |
| Alphaproteobacteria | 0.02   | 0.13   | 0.03   | 0.15   | 0.19   | 0.46   | 0.00     | 0.00   | 0.00   | 0.10   | 0.00 |  |
| Alphaproteobacteria | 0.01   | 0.05   | 0.00   | 11.07  | 18.50  | 19.64  | 0.58     | 0.42   | 1.97   | 13.56  |      |  |
| Alphaproteobacteria | 0.32   | 0.15   | 0.06   | 0.07   | 0.05   | 0.09   | 0.06     | 0.05   | 0.10   | 0.28   |      |  |
| Bacteroidota        | 0.01   | 0.02   | 0.00   | 8.37   | 12.95  | 16.20  | 0.19     | 1.91   | 1.88   | 6.45   |      |  |
| Alphaproteobacteria | 0.01   | 0.05   | 0.33   | 4.24   | 0.40   | 0.00   | 0.26     | 0.14   | 0.20   | 0.06   |      |  |
| Bacteroidota        | 11.24  | 0.15   | 0.00   | 0.00   | 0.00   | 0.01   | 0.13     | 0.09   | 0.30   | 0.06   |      |  |
| Gammaproteobacteria | 0.01   | 0.02   | 0.00   | 10.25  | 15.66  | 14.40  | 0.00     | 0.65   | 1.48   | 2.39   |      |  |
| Kapabacteria        | 0.01   | 0.02   | 0.03   | 0.02   | 0.01   | 0.00   | 0.13     | 0.09   | 0.10   | 0.17   |      |  |
| Gammaproteobacteria | 0.19   | 0.58   | 20.59  | 0.00   | 0.00   | 0.00   | 0.45     | 0.37   | 0.30   | 0.56   |      |  |
| Alphaproteobacteria | 0.01   | 0.02   | 0.03   | 7.61   | 10.13  | 0.02   | 2.75     | 0.37   | 2.57   | 0.61   |      |  |
| Alphaproteobacteria | 0.17   | 0.09   | 0.00   | 0.01   | 0.02   | 0.00   | 3.96     | 1.12   | 1.97   | 0.33   |      |  |
| Alphaproteobacteria | 0.00   | 0.01   | 0.00   | 0.01   | 0.00   | 16.92  | 7.93     | 5.60   | 3.36   | 6.00   |      |  |
| Gammaproteobacteria | 0.04   | 0.09   | 2.99   | 0.04   | 0.00   | 0.00   | 0.32     | 0.33   | 0.30   | 0.17   |      |  |
| Alphaproteobacteria | 0.00   | 0.01   | 0.00   | 2.93   | 4.64   | 1.29   | 0.00     | 0.14   | 0.49   | 1.61   |      |  |
| Verrucomicrobiae    | 0.00   | 0.00   | 0.00   | 6.06   | 0.00   | 0.00   | 0.06     | 0.05   | 0.00   | 0.06   |      |  |
| Rhodotermia         | 0.00   | 0.01   | 0.00   | 7.51   | 0.04   | 0.00   | 0.38     | 0.33   | 0.39   | 1.78   |      |  |
| Hydrogenedentia     | 11.05  | 0.01   | 0.03   | 0.00   | 0.00   | 0.00   | 0.06     | 0.09   | 0.30   | 0.06   |      |  |
|                     | 0.00   | 0.00   | 0.00   | 0.00   | 0.00   | 0.00   | 6.52     | 9.43   | 13.43  | 21.46  |      |  |
|                     | 100.00 | 100.00 | 100.00 | 100.00 | 100.00 | 100.00 | 100.00   | 100.00 | 100.00 | 100.00 |      |  |

**Table S3:** Input data for Figure 4

| Protein ID | MG        |          |          | MP        |       |       | Specie                 | Bins      |
|------------|-----------|----------|----------|-----------|-------|-------|------------------------|-----------|
|            | ecovio FT | PBS      | PCL      | ecovio FT | PBS   | PCL   |                        |           |
| Hyd467     | 0         | 0        | 0        | -15       | -15   | 0     | n.d.                   | n.d.      |
| Est056     | -3.59576  | -1.93713 | 0        | 0         | -15   | 0     | <i>Amylibacter</i>     | bin 43    |
| Lip861     | 1.633848  | 3.116871 | 0        | 0         | 2.56  | -3.84 | <i>Pseudomonas</i>     | bin 31    |
| Hyd905     | 4.077675  | 2.399802 | 5.010139 | 0         | 1.79  | 0     | <i>Alcanivorax</i>     | bin 24    |
| Hyd026     | 4.308193  | 2.305671 | 4.763072 | 0         | 0     | 15    | <i>Alcanivorax</i>     | bin 24    |
| Hyd450     | 4.106315  | 2.252433 | 0        | 3.59      | 0     | 0     | <i>Alcanivorax</i>     | bin 24    |
| Lip174     | 4.286087  | 2.468077 | 5.275697 | 0         | -4.4  | -2.48 | <i>Alcanivorax</i>     | bin 24    |
| Lip810     | 4.14515   | 2.630224 | 0        | 0         | 0     | 15    | <i>Alcanivorax</i>     | bin 24    |
| Hyd934     | 4.02641   | 2.293335 | 4.753048 | 0         | 1.27  | 0     | <i>Alcanivorax</i>     | bin 24    |
| Hyd936     | 4.443065  | 2.561871 | 5.047177 | 2.75      | 0     | 0     | <i>Alcanivorax</i>     | bin 24    |
| Hyd195     | -3.65035  | 0        | 1.051203 | 0         | -1.55 | 0     | <i>Sulfitobacter</i>   | PC_bin 7  |
| Hyd027     | 1.623252  | 3.212674 | 0        | 0         | 0     | 1.44  | <i>Pseudomonas</i>     | bin 31    |
| Est479     | 0         | 0        | 0        | -15       | -2.46 | -15   | n.d.                   | n.d.      |
| Hyd688     | 4.463478  | 2.623525 | 0        | 4.95      | 0     | 3.02  | <i>Alcanivorax</i>     | bin 24    |
| Hyd355     | -6.06256  | -2.71334 | -1.09262 | 0         | -2.64 | 0     | <i>Marinibacterium</i> | bin 35    |
| Hyd360     | 1.831057  | 3.455552 | 0        | 0         | 2.31  | 0     | <i>Pseudomonas</i>     | bin 31    |
| Hyd151     | -5.91814  | -2.8199  | -1.72404 | -15       | 0     | 0     | <i>Marinibacterium</i> | bin 35    |
| Lip103     | 4.274469  | 2.382363 | 0        | 0         | 0     | 3.97  | <i>Alcanivorax</i>     | bin 24    |
| EstB137    | 1.928034  | 0        | 0        | 3.34      | 0     | 0     | <i>Sulfitobacter</i>   | bin 9     |
| Hyd226     | -6.21135  | -2.49845 | -1.57432 | -3.06     | -2.07 | 0     | <i>Marinibacterium</i> | bin 35    |
| Hyd603     | -6.43279  | -2.70112 | -1.5225  | -15       | 0     | 0     | <i>Marinibacterium</i> | bin 35    |
| Hyd634     | 0         | 0        | 0        | 0         | -2.33 | 0     | n.d.                   | n.d.      |
| Hyd566     | 1.723432  | 3.326404 | 0        | 2.78      | 1.81  | 1.33  | <i>Pseudomonas</i>     | bin 31    |
| EstB745    | 0         | 0        | 0        | 15        | 0     | 1.39  | <i>Amylibacter</i>     | bin 29    |
| Hyd842     | -3.79861  | 0        | 0        | 0         | 0     | 2.36  | <i>Sulfitobacter</i>   | PC_bin 7  |
| Hyd900     | 1.609566  | 3.15083  | 0        | 0         | 1.34  | 0     | <i>Pseudomonas</i>     | bin 31    |
| Hyd994     | -14.4397  | -6.0219  | -6.26244 | 0         | 0     | 15    | <i>Roseivirga</i>      | PB_bin 40 |
| Hyd037     | -9.23638  | -5.0425  | -2.21159 | -15       | 0     | 0     | Rhizobiaceae           | bin 21    |
| Hyd519     | -13.9798  | -5.3678  | -6.60507 | 0         | 0     | -15   | <i>Roseivirga</i>      | PB_bin 40 |
| Hyd253     | 1.656443  | 3.280567 | 0        | 0         | -1.66 | 0     | <i>Pseudomonas</i>     | bin 31    |



**Table S3 continued from previous page**

|          | MG       |          |          |       | MP    |       |                     |           |
|----------|----------|----------|----------|-------|-------|-------|---------------------|-----------|
| Lip186   | -15.4734 | -6.78297 | -8.40244 | -5.83 | 0     | 0     | <i>Roseivirga</i>   | PB_bin 40 |
| Hyd958   | 1.781202 | 3.21259  | 0        | 0     | 1.22  | 0     | <i>Pseudomonas</i>  | bin 31    |
| Hyd986   | 4.11002  | 2.15211  | 0        | -2.07 | 0     | 0     | <i>Alcanivorax</i>  | bin 24    |
| Ple-solo | 1.720762 | 3.364631 | 0        | 9.99  | 5.48  | 6.99  | <i>Pseudomonas</i>  | bin 31    |
| Hyd066   | 1.587635 | 3.220406 | 0        | 0     | 15    | 0     | <i>Pseudomonas</i>  | bin 31    |
| Hyd916   | -9.63378 | -3.53663 | -1.90118 | -4    | 0     | 0     | Rhizobiaceae        | bin 21    |
| Ple-tan1 | 1.824961 | 3.537869 | 0        | 3.58  | 3.03  | 0     | <i>Pseudomonas</i>  | bin 31    |
| Ple-tan2 | 1.711153 | 3.464858 | 0        | 7.33  | 4.16  | 3.63  | <i>Pseudomonas</i>  | bin 31    |
| Hyd031   | 0        | 0        | 0        | -3.72 | -3.1  | 0     | n.d.                | n.d.      |
| Hyd205   | 1.717854 | 3.462332 | 0        | 0     | 3.24  | 2.09  | <i>Pseudomonas</i>  | bin 31    |
| Hyd330   | -8.95992 | -3.40365 | -2.38198 | 0     | 15    | 0     | Rhizobiaceae        | bin 21    |
| Lip285   | 1.730592 | 3.428653 | 0        | 3.4   | 0     | 3.84  | <i>Pseudomonas</i>  | bin 31    |
| Est530   | 0        | 0        | 0        | 0     | 0     | -1.75 | <i>Thalassobius</i> | PB_bin 16 |
| Lip392   | 0        | 0        | -1.44148 | -15   | 0     | -15   | <i>Thalassobius</i> | bin 47    |
| Hyd620   | -8.52666 | -1.90636 | -2.63575 | 0     | -2.05 | 0     | Rhizobiaceae        | bin 21    |
| Est729   | -9.11621 | -3.19877 | -1.88342 | -5.23 | 0     | 1.75  | Rhizobiaceae        | bin 21    |
| Hyd022   | 0        | 0        | -1.56901 | 0     | 0     | -15   | <i>Thalassobius</i> | bin 47    |
| Hyd162   | 1.561715 | 3.488448 | 0        | 0     | 2.47  | 0     | <i>Pseudomonas</i>  | bin 31    |
| Hyd703   | 0        | 0        | -1.44819 | 0     | 0     | -15   | <i>Thalassobius</i> | bin 47    |
| Lip528   | 0        | 0        | 1.710142 | 0     | 2.9   | 0     | <i>Marinobacter</i> | PB_bin 43 |
| Hyd199   | 1.677197 | 3.387073 | 0        | 2.12  | 3.66  | 0     | <i>Pseudomonas</i>  | bin 31    |
| Hyd507   | 1.676719 | 3.391498 | 0        | 0     | 15    | 0     | <i>Pseudomonas</i>  | bin 31    |
| Est192   | 4.388763 | 2.304701 | 0        | 4.39  | -15   | 0     | <i>Alcanivorax</i>  | bin 24    |
| Hyd307   | 1.434085 | 3.40281  | 0        | 0     | 2.76  | 0     | <i>Pseudomonas</i>  | bin 31    |
| Hyd663   | 1.642617 | 3.30779  | 0        | 0     | 3.2   | 0     | <i>Pseudomonas</i>  | bin 31    |
